# Supplementary material
Source: MDPI journal article supplement (https://www.mdpi.com/2073-4395/11/7/1429)

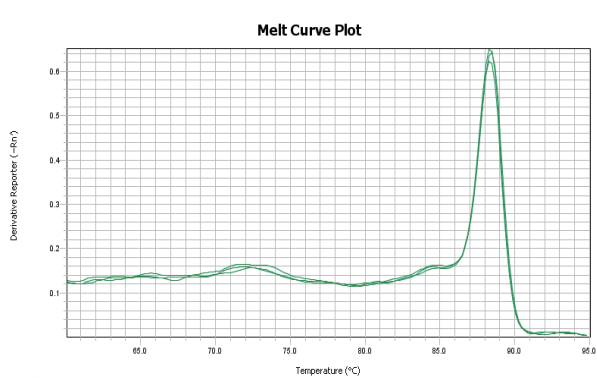

LSM5-1D

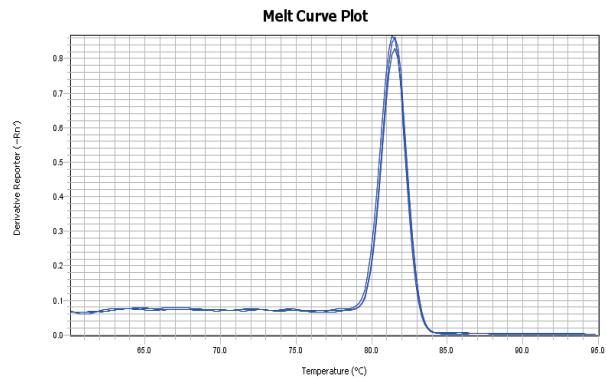

LSM7-7A

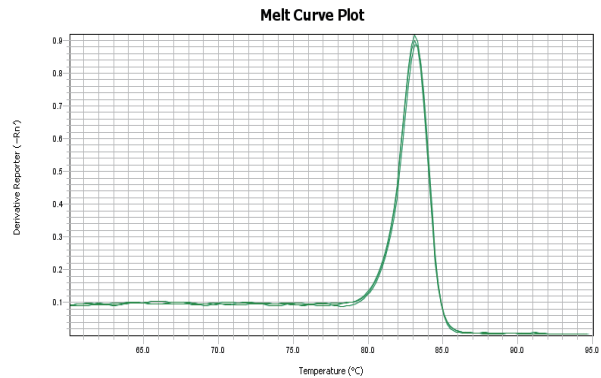

LSM8-1A

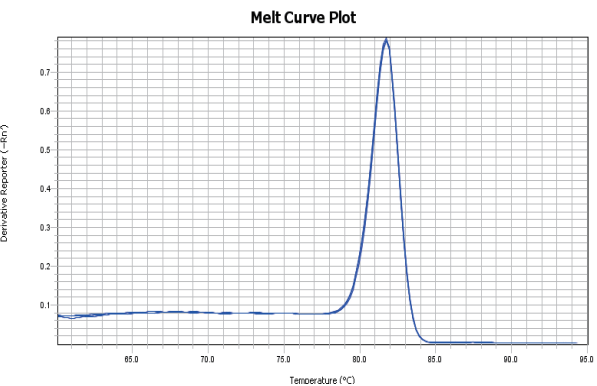

SMD1-2D

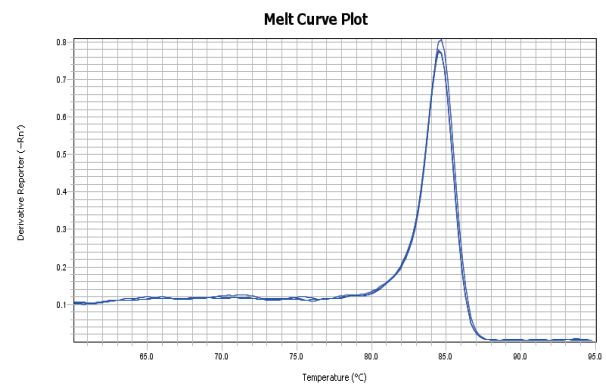

SMD1-6D

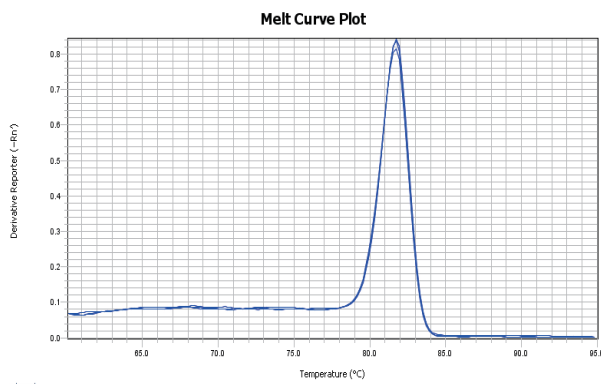

SMD2-5A

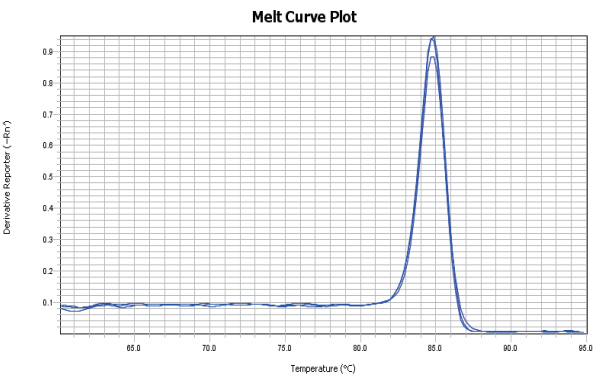

SMD1-2A

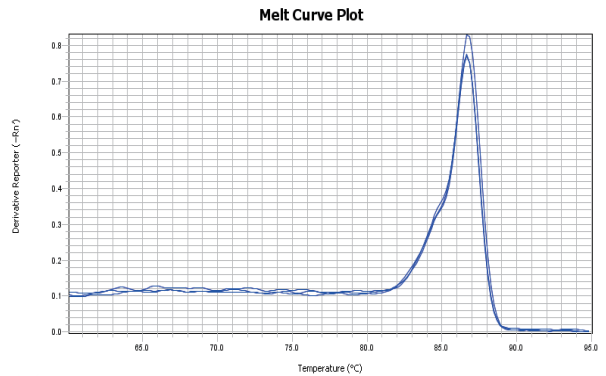

SMF-6B

Supplement: s1 [file s1]
